# Supplementary material
Source: PubMed Central journal article supplement (PMC3585517)
Supplement: supp_125.24.6009_JCS109546.pdf [file supp_125.24.6009_JCS109546.pdf]

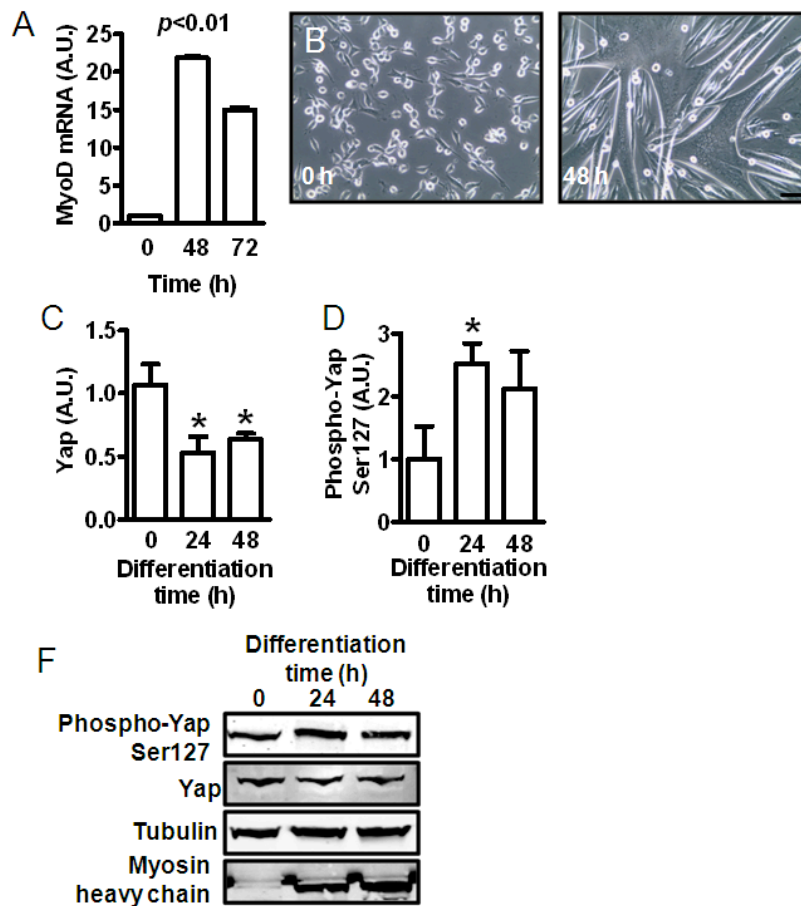

**Fig. S1.** A Expression of the satellite cell activation marker MyoD in satellite cells trypsin-digested of *ex vivo* cultured fibres in proliferation medium (ANOVA; n=3 each; mean±s.d.). B Satellite cell-derived myoblasts prior to change to differentiation medium and 48 h after the change to differentiation medium. C Total Yap protein relative to tubulin and D phospho-Yap Ser127 protein relative to total Yap (ANOVA; n=3 each; A ‘\*’ indicates a significant difference to 0 h; mean±s.d.). F Examples of the original blots plus myosin heavy chain as a differentiation marker.

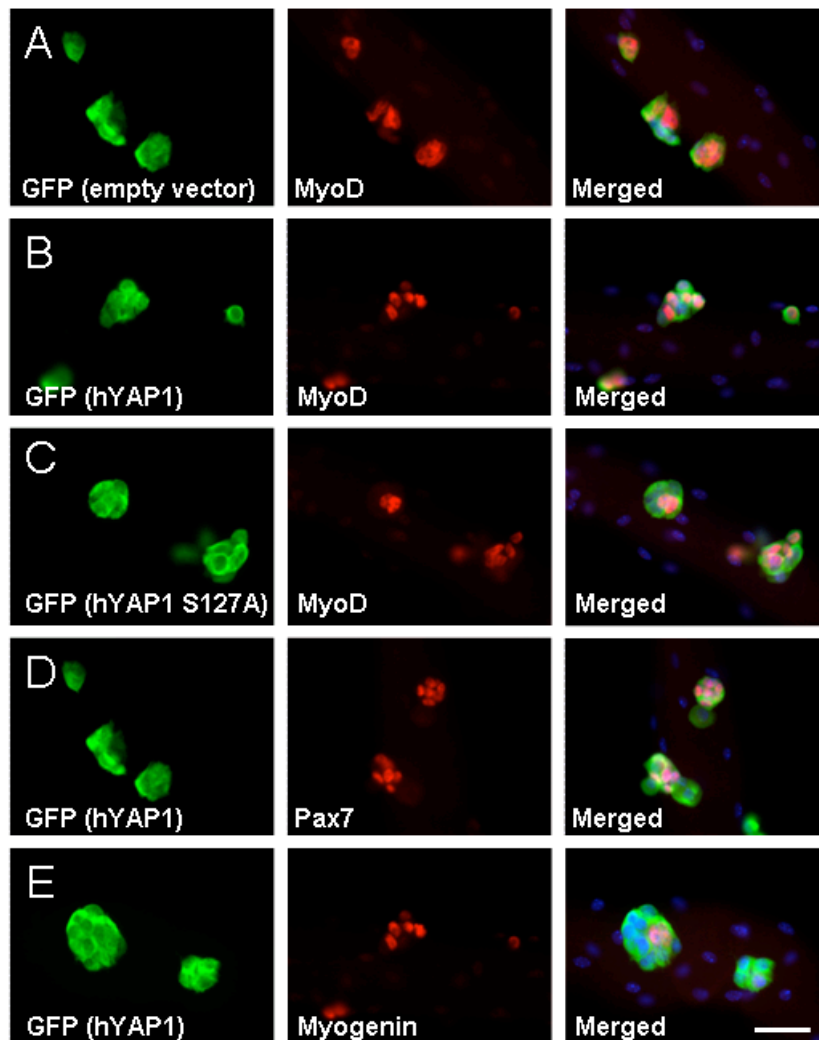

**Fig. S2.** No significant change in the percentage of MyoD-positive cells following retroviral over expression of wildtype hYAP1 (B) or hYAP1 S127A (C) compared to empty vector control (A) satellite cells after 72 h of *ex vivo* culture. For quantification see **Figure 4E**. D,E Effect of retroviral over expression of hYAP1 on Pax7 (D) and myogenin (E) after 72 h of *ex vivo* culture. For quantification see again **Figure 4E**. Scale bar 50  $\mu$ m.

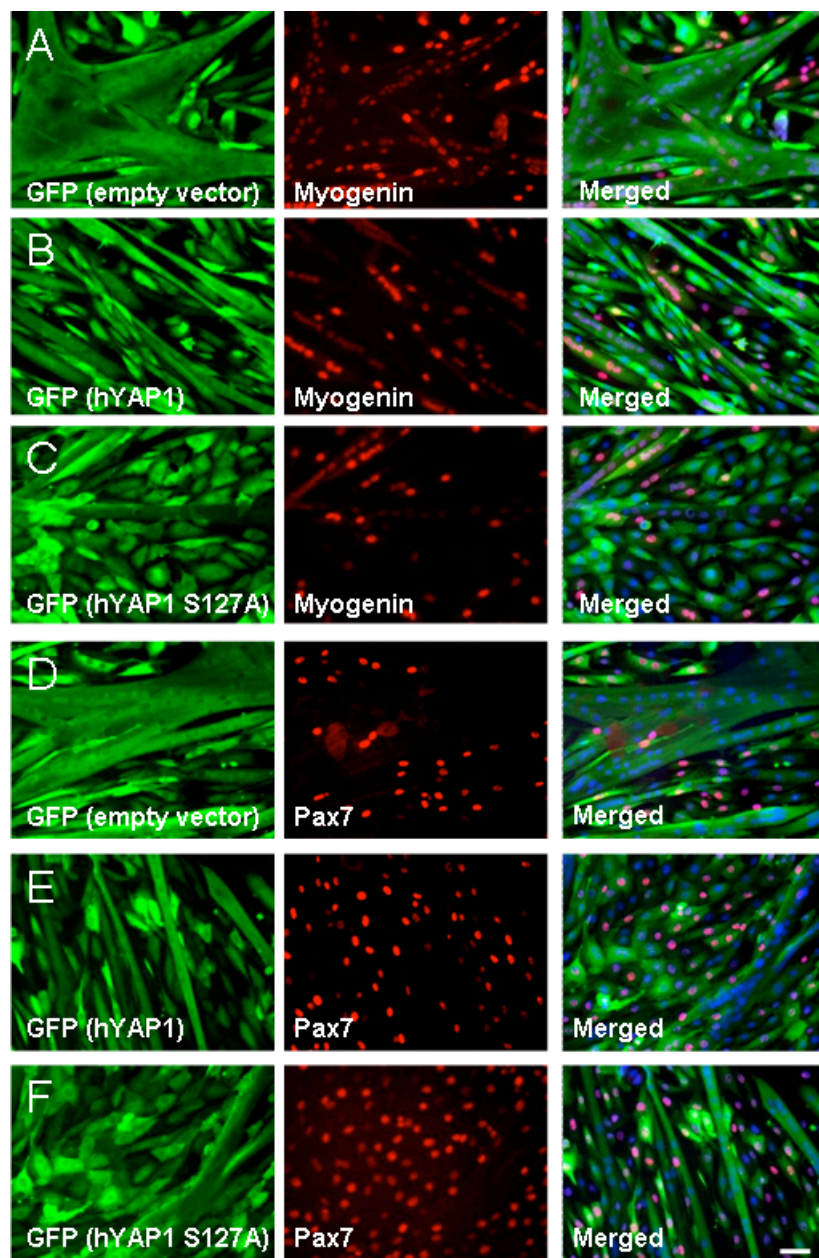

**Fig. S3.** Example images detailing the effect of empty vector (A,D), wildtype hYAP1 (B,E) and constitutively active hYAP1 S127A expression (C,F) on myogenin (A-C) and Pax7 (D-E) expression. A quantification of this data is presented in **Figure 5D**. Scale bar 50  $\mu$ m.

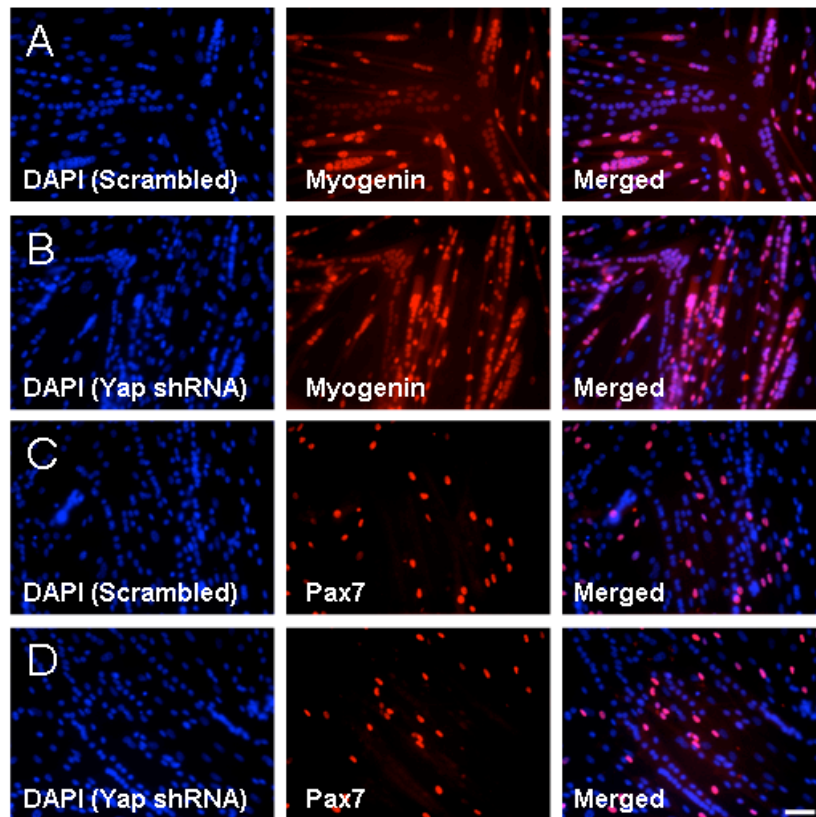

**Fig. S4.** Example images detailing the effect of scrambled control RNA (A,C) or Yap shRNA B (B,D) on myogenin (A,B) and Pax7 (C,D) expression. A quantification of this data is presented in **Figure 6C**. Scale bar 50  $\mu$ m.

**[Table S1. Microarray results doxycycline \(hYAP1 S127A over expression\) versus negative control](#)**

**[Table S2. Overlap between genes that respond to doxycycline \(hYAP1 S127A over expression\) at 20 h and 40 h with genes attributed to Gene ontology \(GO\) terms](#)**

**[Table S3. Overlap between genes that respond to doxycycline \(hYAP1 S127A over expression\) at 20 h and 40 h with genes whose promoter can be occupied by Tead1 or Tead4 in skeletal muscle cells](#)**
